# Supplementary material for: Crystal and electronic structures and magnetic susceptibility of the photochemically prepared layered vanadyl phosphate Na(VO)2(PO4)2·4H2O †
Source: Royal Society of Chemistry journal article supplement (doi:10.1039/a909452k), 2000-01-01
Supplement: a909452k.doc [file a909452k.doc]

Table 1S. Computed energy levels (eV) and predominant atomic orbital coefficients of the selected MO for the fragment model [V8P8O40]4- (Figure 6) a

|  | MO163 | MO164 | MO168 | MO181 | MO182 | MO184 |
| --- | --- | --- | --- | --- | --- | --- |
| energy level (eV)  V(1) dxy  dyz | -7.796 | -7.793 | -7.706  0.761 | -7.295 | -7.290  -0.241 | -7.246 |
| V(2) dxy  dzx  d yz |  |  | -0.580 | -0.702 | 0.662 | -0.699 |
| V(3) dxy  dyz | 0.274 |  | 0.117 |  | 0.217 |  |
| V(4) dxy  dyz |  | 0.228 | 0.142 |  |  |  |
| V(6) dxy  dyz  dz2  dx2-y2 | 0.936  0.142 |  | -0.105 | -0.681 | -0.656 |  |
| V(7) dxy  dzx  dx2-y2 |  | 0.956  -0.106 | -0.110 |  |  | 0.703 |
| O(2) px  py |  |  |  | -0.196 | 0.185 | -0.199 |
| O(20) px  py |  |  |  | -0.190 | -0.183 |  |
| O(21) px  py |  |  |  |  |  | 0.200 |

a Atomic orbitals with their orbital coefficients of more than 0.1 (less than -0.1) are indicated.
